# Supplementary material for: Genomic and Metabolic Insights into Two Novel Thiothrix Species from Enhanced Biological Phosphorus Removal Systems
Source: PubMed Central journal article supplement (PMC7767063; doi:10.3390/microorganisms8122030), 2020-12-18
Supplement: microorganisms-08-02030-s001.pdf [file microorganisms-08-02030-s001.pdf]

**Table S1.** Identity level of 16S rRNA genes in representatives of the genus *Thiothrix*, %.

|                                          | <i>Thiothrix</i> sp.<br>RT | <i>Thiothrix</i><br>sp.SSD2 | <i>T. nivea</i><br>DSM 5205 <sup>T</sup> | <i>T. unzii</i> A1 <sup>T</sup> | <i>T. lacustris</i><br>BL <sup>T</sup> | <i>T. caldifontis</i><br>G1 <sup>T</sup> | <i>T. fructosivorans</i><br>Q <sup>T</sup> |
|------------------------------------------|----------------------------|-----------------------------|------------------------------------------|---------------------------------|----------------------------------------|------------------------------------------|--------------------------------------------|
| <i>Thiothrix</i> sp RT                   | 100.0                      | 93.0                        | 97.9                                     | 95.9                            | 96.1                                   | 96.3                                     | 94.9                                       |
| <i>Thiothrix</i> sp SSD2                 | 94.0                       | 100.0                       | 96.1                                     | 94.8                            | 94.6                                   | 94.3                                     | 93.3                                       |
| <i>T. nivea</i> DSM<br>5205 <sup>T</sup> | 97.9                       | 96.1                        | 100.0                                    | 94.6                            | 95.1                                   | 95.1                                     | 94.3                                       |
| <i>T. unzii</i> A1 <sup>T</sup>          | 95.9                       | 94.8                        | 95.41                                    | 100.0                           | 95.4                                   | 95.5                                     | 95.7                                       |
| <i>T. lacustris</i> BL <sup>T</sup>      | 96.1                       | 94.6                        | 94.6                                     | 94.8                            | 100.0                                  | 98.7                                     | 98.6                                       |
| <i>T. caldifontis</i> G1 <sup>T</sup>    | 96.3                       | 94.3                        | 95.1                                     | 95.5                            | 98.7                                   | 100.0                                    | 98.9                                       |

**Table S2.** Molecular characteristics of representatives of the genus *Thiothrix*.

| Species                                        | <i>T. nivea</i><br>DSM 5205 <sup>T</sup> | <i>T. lacustris</i> BL <sup>T</sup> | <i>T. caldifontis</i> G1 <sup>T</sup> | <i>Thiothrix</i> sp. RT | <i>Thiothrix</i> sp.<br>SSD2 |
|------------------------------------------------|------------------------------------------|-------------------------------------|---------------------------------------|-------------------------|------------------------------|
| <b>% Average nucleotide identity (ANI) to:</b> |                                          |                                     |                                       |                         |                              |
| <i>T. nivea</i> DSM 5205 <sup>T</sup>          | 100.0                                    | 76.7                                | 75.5                                  | 77.5                    | 80.2                         |
| <i>T. lacustris</i> BL <sup>T</sup>            | 76.7                                     | 100.0                               | 79.0                                  | 76.5                    | 75.9                         |
| <i>T. caldifontis</i> G1 <sup>T</sup>          | 75.5                                     | 79.0                                | 100.0                                 | 76.7                    | 74.8                         |
| <i>Thiothrix</i> sp. RT                        | 77.5                                     | 76.5                                | 76.7                                  | 100.0                   | 76.7                         |
| <i>Thiothrix</i> sp. SSD2                      | 80.2                                     | 75.9                                | 74.8                                  | 76.7                    | 100.0                        |
| <b>% dDDH to:</b>                              |                                          |                                     |                                       |                         |                              |
| <i>T. nivea</i> DSM 5205 <sup>T</sup>          | 100.0                                    | 23.9                                | 23.8                                  | 25.6                    | 27.3                         |
| <i>T. lacustris</i> BL <sup>T</sup>            | 23.9                                     | 100.0                               | 28.0                                  | 24.9                    | 22.4                         |
| <i>T. caldifontis</i> G1 <sup>T</sup>          | 23.8                                     | 28.0                                | 100.0                                 | 30.2                    | 22.7                         |
| <i>Thiothrix</i> sp. RT                        | 25.6                                     | 24.9                                | 30.2                                  | 100.0                   | 24.9                         |
| <i>Thiothrix</i> sp. SSD2                      | 27.3                                     | 22.4                                | 22.7                                  | 24.9                    | 100.0                        |

**Table S3.** Genes encoding enzymes of metabolic pathways in *Thiothrix* sp. SSD2 and *Thiothrix* sp. RT.

| Gene                     | Predicted function                                                    | <i>Thiothrix</i> sp. RT                                                                                                | <i>Thiothrix</i> sp. SSD2    |
|--------------------------|-----------------------------------------------------------------------|------------------------------------------------------------------------------------------------------------------------|------------------------------|
|                          |                                                                       | RefSeq (GeneBank) ID of gene                                                                                           | RefSeq (GeneBank) ID of gene |
| <b>Sulfur metabolism</b> |                                                                       |                                                                                                                        |                              |
| <i>sqrA</i>              | Sulfide quinone<br>oxidoreductase SqrA (EC<br>1.8.5.4)                | fig 6666666.654935.peg.2381                                                                                            | QLQ30307.1                   |
| <i>sqrF</i>              | Sulfide quinone<br>oxidoreductase SqrF (EC<br>1.8.5.4)                | fig 6666666.654935.peg.1874                                                                                            | QLQ32374.1                   |
| <i>fccB</i>              | Sulfide dehydrogenase<br>(flavocytochrome c)<br>flavoprotein chain    | fig 6666666.654935.peg.278<br>fig 6666666.654935.peg.268<br>fig 6666666.654935.peg.1885<br>fig 6666666.654935.peg.1391 | QLQ32594.1                   |
| <i>fccA</i>              | cytochrome c subunit of<br>flavocytochrome c sulfide<br>dehydrogenase | fig 6666666.654935.peg.269                                                                                             | QLQ32595.1                   |

|             |                                                                                          |                                                            |                                           |
|-------------|------------------------------------------------------------------------------------------|------------------------------------------------------------|-------------------------------------------|
| <i>sqrD</i> | Sulfide quinone oxidoreductase SqrD (EC 1.8.5.4)                                         | —                                                          | QLQ32934.1                                |
| <i>soxA</i> | sulfur oxidation c-type cytochrome SoxA (EC 1.8.2.3)                                     | fig 6666666.654935.peg.3301<br>fig 6666666.654935.peg.708  | QLQ32948.1<br>QLQ33792.1                  |
| <i>soxZ</i> | thiosulfate oxidation carrier complex protein SoxZ (EC 1.8.2.6)                          | fig 6666666.654935.peg.2874<br>fig 6666666.654935.peg.709  | QLQ33790.1<br>QLQ33793.1                  |
| <i>soxY</i> | thiosulfate oxidation carrier protein SoxY (EC 1.8.2.6)                                  | fig 1947697.4.peg.582<br>fig 1947697.4.peg.2162            | QLQ33791.1<br>QLQ33794.1                  |
| <i>soxB</i> | thiosulfohydrolase SoxB (EC 3.1.6.20)                                                    | fig 6666666.654935.peg.2028                                | QLQ33787.1                                |
| <i>soxX</i> | sulfur oxidation c-type cytochrome SoxX (EC 1.8.2.3)                                     | fig 6666666.654935.peg.3302<br>fig 6666666.654935.peg.572  | QLQ32949.1<br>QLQ33795.1                  |
| <i>soeA</i> | sulfite dehydrogenase (quinone) subunit SoeA (EC 1.8.5.6)                                | fig 6666666.654935.peg.2056                                | WP_012971673.1<br>locus_tag="HZT40_19335" |
| <i>soeB</i> | sulfite dehydrogenase (quinone) subunit SoeB (EC 1.8.5.6)                                | fig 6666666.654935.peg.2057                                | QLQ34300.1                                |
| <i>soeC</i> | sulfite dehydrogenase (quinone) subunit SoeC (EC 1.8.5.6)                                | fig 6666666.654935.peg.2058                                | QLQ33396.1                                |
| <i>aprA</i> | adenylylsulfate reductase, subunit A (EC 1.8.4.10)                                       | fig 6666666.654935.peg.3158                                | QLQ33717.1                                |
| <i>aprB</i> | adenylylsulfate reductase, subunit B (EC 1.8.4.10)                                       | fig 6666666.654935.peg.3159                                | QLQ33716.1                                |
| <i>sat</i>  | sulfate adenylyltransferase (EC 2.7.7.4)                                                 | fig 6666666.654935.peg.3160                                | QLQ33715.1                                |
| <i>dsrA</i> | Dissimilatory sulfite reductase, alpha subunit (EC 1.8.99.5)                             | fig 6666666.654935.peg.3292                                | QLQ32927.1                                |
| <i>dsrB</i> | Dissimilatory sulfite reductase, beta subunit (EC 1.8.99.5)                              | fig 6666666.654935.peg.3291                                | QLQ32926.1                                |
| <i>dsrE</i> | tRNA 2-thiouridine synthesizing protein D (EC 2.8.1.-)                                   | fig 6666666.654935.peg.3290                                | QLQ32925.1                                |
| <i>dsrF</i> | tRNA 2-thiouridine synthesizing protein C (EC 2.8.1.-)                                   | fig 6666666.654935.peg.3289                                | QLQ32924.1                                |
| <i>dsrH</i> | tRNA 2-thiouridine synthesizing protein B (EC 2.8.1.-)                                   | fig 6666666.654935.peg.3288                                | QLQ32923.1                                |
| <i>dsrC</i> | tRNA 2-thiouridine synthesizing protein E (EC 2.8.1.-)                                   | fig 6666666.654935.peg.3287<br>fig 6666666.654935.peg.3296 | QLQ32922.1<br>QLQ30843.1                  |
| <i>dsrM</i> | sulfite reduction-associated complex DsrMKJOP protein DsrM                               | fig 6666666.654935.peg.3286                                | QLQ34178.1                                |
| <i>dsrK</i> | sulfite reduction-associated complex DsrMKJOP protein DsrK                               | fig 6666666.654935.peg.3285                                | QLQ32920.1                                |
| <i>dsrL</i> | glutamate synthase (NADPH) small chain dsrL/ intracellular sulfur oxidation protein DsrL | fig 6666666.654935.peg.3284                                | QLQ33191.1                                |

|                            |                                                                        |                                                            |                                           |
|----------------------------|------------------------------------------------------------------------|------------------------------------------------------------|-------------------------------------------|
| <i>dsrJ</i>                | Sulfite reduction-associated complex DsrMKJOP multiheme protein DsrJ   | fig 6666666.654935.peg.3283                                | QLQ32918.1                                |
| <i>dsrO</i>                | sulfite reduction-associated complex DsrMKJOP iron-sulfur protein DsrO | fig 6666666.654935.peg.3282                                | QLQ32917.1                                |
| <i>dsrP</i>                | sulfite reduction-associated complex DsrMKJOP protein DsrP             | fig 6666666.654935.peg.3281                                | QLQ32917.1                                |
| <i>dsrN</i>                | Cobyrinic acid A,C-diamide synthase DsrN (EC 6.3.5.11)                 | fig 6666666.654935.peg.2759                                | QLQ31889.1                                |
| <i>dsrR</i>                | protein involved in sulfur oxidation DsrR                              | fig 6666666.654935.peg.2760                                | —                                         |
| <i>dsrS</i>                | protein involved in sulfur oxidation DsrS                              | fig 6666666.654935.peg.40                                  | QLQ31126.1                                |
| <b>Nitrogen metabolism</b> |                                                                        |                                                            |                                           |
| <i>narG</i>                | nitrate reductase alpha subunit (EC 1.7.5.1)                           | fig 6666666.654935.peg.651                                 | QLQ32018.1                                |
| <i>narH</i>                | nitrate reductase beta subunit (EC 1.7.5.1)                            | fig 6666666.654935.peg.652                                 | QLQ32018.1                                |
| <i>narI</i>                | nitrate reductase gamma subunit (EC 1.7.5.1)                           | fig 6666666.654935.peg.654                                 | QLQ34178.1                                |
| <i>narJ</i>                | nitrate reductase delta subunit (EC 1.7.5.1)                           | fig 6666666.654935.peg.653                                 | WP_020558834.1<br>locus_tag="HZT40_10965" |
| <i>nirS</i>                | nitrite reductase (NO-forming) (EC 1.7.2.1)                            | —                                                          | QLQ34181.1                                |
| <i>cnorB</i>               | nitric oxide reductase subunit B (EC 1.7.2.5)                          | fig 6666666.654935.peg.1942                                | QLQ32042.1                                |
| <i>cnorC</i>               | nitric oxide reductase subunit C (EC 1.7.2.5)                          | fig 6666666.654935.peg.1941                                | QLQ32043.1                                |
| <i>nirB</i>                | nitrite reductase (NADH) large subunit (EC 1.7.1.1)                    | fig 6666666.654935.peg.1096                                | QLQ33725.1                                |
| <i>nirD</i>                | nitrite reductase (NADH) small subunit (EC 1.7.1.1)                    | fig 6666666.654935.peg.1097                                | WP_002709036.1<br>locus_tag="HZT40_21300" |
| <i>nifA</i>                | Nif-specific regulatory protein NifA                                   | fig 6666666.654935.peg.634                                 | QLQ31724.1                                |
| <i>nifS</i>                | cysteine desulfurase NifS (EC 2.8.1.7)                                 | fig 6666666.654935.peg.668                                 | QLQ31672.1                                |
| <i>nifU</i>                | nitrogen fixation protein NifU and related proteins                    | fig 6666666.654935.peg.667                                 | QLQ30621.1                                |
| <i>nifB</i>                | nitrogen fixation protein NifB                                         | fig 6666666.654935.peg.656                                 | QLQ31713.1                                |
| <i>nifX</i>                | nitrogen fixation protein NifX                                         | fig 6666666.654935.peg.2777                                | QLQ32343.1                                |
| <i>nifX2</i>               | nitrogen fixation protein NifX2                                        | fig 6666666.654935.peg.2779                                | QLQ32343.1                                |
| <i>nifB2</i>               | nitrogen fixation protein NifB2                                        | —                                                          | QLQ31713.1                                |
| <i>nifY</i>                | nitrogen fixation-related protein, gamma subunit                       | fig 6666666.654935.peg.3527                                | —                                         |
| <i>nifE</i>                | nitrogenase molybdenum-cofactor synthesis protein NifE (EC 1.18.6.1)   | fig 6666666.654935.peg.2774<br>fig 6666666.654935.peg.2775 | QLQ34086.1                                |
| <i>nNifN</i>               | nitrogenase molybdenum-iron protein NifN (EC 1.18.6.1.)                | fig 6666666.654935.peg.2776                                | QLQ34087.1                                |
| <i>nifQ</i>                | nitrogen fixation protein NifQ                                         | fig 6666666.654935.peg.662                                 | QLQ31677.1                                |

|                                                                     |                                                                               |                                                            |                          |
|---------------------------------------------------------------------|-------------------------------------------------------------------------------|------------------------------------------------------------|--------------------------|
| <i>nifV</i>                                                         | homocitrate synthase NifV<br>(EC 2.3.3.14)                                    | fig 6666666.654935.peg.675                                 | QLQ30738.1               |
| <i>nifW</i>                                                         | nitrogen fixation protein<br>NifW                                             | fig 6666666.654935.peg.614                                 | QLQ30752.1               |
| <i>nifM</i>                                                         | nitrogen fixation protein<br>NifM                                             | fig 6666666.654935.peg.616                                 | QLQ30754.1               |
| <i>nifH</i>                                                         | nitrogenase iron protein NifH<br>(EC 1.18.6.1)                                | fig 6666666.654935.peg.3522                                | QLQ32348.1               |
| <i>nifD</i>                                                         | nitrogenase molybdenum-<br>iron protein alpha chain (EC<br>1.18.6.1)          | fig 6666666.654935.peg.3523                                | QLQ32347.1               |
| <i>nifK</i>                                                         | nitrogenase molybdenum-<br>iron protein beta chain (EC<br>1.18.6.1)           | fig 6666666.654935.peg.3524                                | QLQ32346.1               |
| <i>nifZ</i>                                                         | nitrogen fixation protein NifZ                                                | fig 6666666.654935.peg.615                                 | QLQ30753.1               |
| <i>nifT</i>                                                         | nitrogen fixation protein NifT                                                | fig 6666666.654935.peg.3525                                | QLQ32345.1               |
| <i>nifO</i>                                                         | NifO                                                                          | —                                                          | QLQ31710.1               |
| <b>Phosphorus metabolism</b>                                        |                                                                               |                                                            |                          |
| <i>phoU</i>                                                         | phosphate transport system<br>protein PhoU                                    | fig 6666666.654935.peg.2604                                | QLQ33978.1               |
| <i>phoR</i>                                                         | Phosphate regulon sensor<br>protein PhoR (EC 2.7.13.3)                        | fig 6666666.654935.peg.2602                                | QLQ32508.1               |
| <i>phoB</i>                                                         | Phosphate regulon<br>transcriptional regulatory<br>protein PhoB (EC 2.7.13.3) | fig 6666666.654935.peg.1341<br>fig 6666666.654935.peg.2603 | QLQ32507.1               |
| <i>pstS</i>                                                         | phosphate transport system<br>permease protein PstS                           | fig 6666666.654935.peg.1741<br>fig 6666666.654935.peg.260  | QLQ31375.1               |
| <i>pstA</i>                                                         | phosphate transport system<br>permease protein PstA (EC<br>7.3.2.1)           | fig 6666666.654935.peg.2606                                | QLQ31376.1<br>QLQ32506.1 |
| <i>pstC</i>                                                         | phosphate transport system<br>permease protein PstC (EC<br>7.3.2.1)           | fig 6666666.654935.peg.2607                                | QLQ32505.1               |
| <i>pstB</i>                                                         | pstA; phosphate transport<br>system permease protein PstB<br>(EC 7.3.2.1)     | fig 6666666.654935.peg.2605                                | QLQ31377.1               |
| <i>ppk1</i>                                                         | polyphosphate kinase<br>(EC 2.7.4.1)                                          | fig 6666666.654935.peg.1345                                | QLQ34227.1               |
| <i>epp</i>                                                          | Exopolyphosphatase (EC<br>3.6.1.11)                                           | fig 6666666.654935.peg.540                                 | QLQ33092.1               |
| <b>Embden-Meyerhof (EM) pathway and Calvin-Benson-Bassham cycle</b> |                                                                               |                                                            |                          |
| <i>glk</i>                                                          | Glucokinase (EC 2.7.1.2)                                                      | fig 6666666.654935.peg.695<br>fig 6666666.654935.peg.2090  | QLQ32326.1               |
| <i>pgi</i>                                                          | glucose-6-phosphate<br>isomerase (EC 5.3.1.9)                                 | fig 6666666.654935.peg.2089                                | QLQ33478.1               |
| <i>pfk</i>                                                          | 6-phosphofructokinase (EC<br>2.7.1.11)                                        | fig 6666666.654935.peg.3154                                | QLQ33720.1               |
| <i>fbaA</i>                                                         | fructose-bisphosphate<br>aldolase class II (EC 4.1.2.13)                      | fig 6666666.654935.peg.2989                                | QLQ33878.1               |
| <i>tpiA</i>                                                         | triosephosphate isomerase<br>(EC 5.3.1.1)                                     | fig 6666666.654935.peg.1194                                | QLQ32910.1               |
| <i>gapA</i>                                                         | NAD-dependent<br>glyceraldehyde-3-phosphate<br>dehydrogenase (EC 1.2.1.12)    | fig 6666666.654935.peg.1302<br>fig 6666666.654935.peg.2986 | QLQ33881.1               |
| <i>pgk</i>                                                          | Phosphoglycerate kinase (EC<br>2.7.2.3)                                       | fig 6666666.654935.peg.2987                                | QLQ33880.1               |

|                                                                                         |                                                                                              |                                                                                          |                                                                       |
|-----------------------------------------------------------------------------------------|----------------------------------------------------------------------------------------------|------------------------------------------------------------------------------------------|-----------------------------------------------------------------------|
| <i>gpmI</i>                                                                             | 2,3-bisphosphoglycerate-independent phosphoglycerate mutase (EC 5.4.2.1)                     | fig 6666666.654935.peg.974                                                               | QLQ34313.1                                                            |
| <i>gpmB</i>                                                                             | alpha-ribazole-5'-phosphate phosphatase (EC 3.1.3.73)                                        | fig 6666666.654935.peg.1632                                                              | —                                                                     |
| <i>eno</i>                                                                              | Enolase (EC 4.2.1.11)                                                                        | fig 6666666.654935.peg.2493                                                              | QLQ31148.1                                                            |
| <i>pyk</i>                                                                              | Pyruvate kinase (EC 2.7.1.40)                                                                | fig 6666666.654935.peg.2988                                                              | QLQ33879.1<br>QLQ31383.1                                              |
| <i>aceE</i>                                                                             | Pyruvate dehydrogenase E1 component (EC 1.2.4.1)                                             | fig 6666666.654935.peg.745<br>fig 6666666.654935.peg.2843                                | QLQ33197.1<br>QLQ31452.1                                              |
| <i>pdhC</i>                                                                             | Dihydrolipoamide acetyltransferase component of pyruvate dehydrogenase complex (EC 2.3.1.12) | fig 6666666.654935.peg.746<br>fig 6666666.654935.peg.2844                                | QLQ33196.1                                                            |
| <i>pdhD</i>                                                                             | Dihydrolipoamide dehydrogenase of pyruvate dehydrogenase complex (EC 1.8.1.4)                | fig 6666666.654935.peg.747<br>fig 6666666.654935.peg.1364<br>fig 6666666.654935.peg.2845 | QLQ33195.1<br>QLQ31603.1<br>WP_019023766.1<br>locus_tag="HZT40_07365" |
| <i>rpiA</i>                                                                             | Ribose 5-phosphate isomerase A (EC 5.3.1.6)                                                  | fig 6666666.654935.peg.1410                                                              | QLQ30286.1                                                            |
| <i>rpe</i>                                                                              | Ribulose-phosphate 3-epimerase (EC 5.1.3.1)                                                  | —                                                                                        | QLQ31009.1                                                            |
| <i>tktA</i>                                                                             | Transketolase (EC 2.2.1.1)                                                                   | fig 6666666.654935.peg.2985                                                              | QLQ33882.1                                                            |
| <i>fbp</i>                                                                              | Fructose-1,6-bisphosphatase, type I (EC 3.1.3.11)                                            | fig 6666666.654935.peg.1039                                                              | present, but not annotated                                            |
| <i>rbcL</i>                                                                             | Ribulose bisphosphate carboxylase large chain (EC 4.1.1.39)                                  | fig 6666666.654935.peg.1163<br>fig 6666666.654935.peg.900                                | QLQ31332.1                                                            |
| <i>rbcS</i>                                                                             | Ribulose bisphosphate carboxylase small chain (EC 4.1.1.39)                                  | fig 6666666.654935.peg.901<br>fig 6666666.654935.peg.1164                                | QLQ31406.1                                                            |
| <i>prkB</i>                                                                             | Phosphoribulokinase (EC 2.7.1.19)                                                            | fig 6666666.654935.peg.948                                                               | QLQ33508.1                                                            |
| <b>Tricarboxylic acid (TCA) cycle, glyoxylate cycle and a way to anabolism from TCA</b> |                                                                                              |                                                                                          |                                                                       |
| <i>gltA</i>                                                                             | Citrate synthase (si) (EC 2.3.3.1)                                                           | fig 6666666.654935.peg.1367                                                              | QLQ31602.1                                                            |
| <i>acnB</i>                                                                             | Aconitate hydratase 2 (EC 4.2.1.3)                                                           | fig 6666666.654935.peg.1368                                                              | QLQ31601.1                                                            |
| <i>idh</i>                                                                              | Isocitrate dehydrogenase (NADP) (EC 1.1.1.42)                                                | fig 6666666.654935.peg.2560<br>fig 6666666.654935.peg.1253                               | QLQ31348.1<br>QLQ31637.1                                              |
| <i>sucA</i>                                                                             | 2-oxoglutarate dehydrogenase E1 component (EC 1.2.4.2)                                       | fig 6666666.654935.peg.1361<br>fig 6666666.654935.peg.2190                               | QLQ31177.1<br>QLQ31079.1                                              |
| <i>sucB</i>                                                                             | 2-oxoglutarate dehydrogenase E2 complex (EC 2.3.1.61)                                        | fig 6666666.654935.peg.1363                                                              | QLQ31604.1                                                            |
| <i>sucD</i>                                                                             | Succinyl-CoA ligase (ADP-forming) alpha chain (EC 6.2.1.5)                                   | fig 6666666.654935.peg.1366                                                              | WP_002706977.1<br>locus_tag="HZT40_08370"                             |
| <i>sucC</i>                                                                             | Succinyl-CoA ligase (ADP-forming) beta chain (EC 6.2.1.5)                                    | fig 6666666.654935.peg.1365                                                              | WP_002706976.1<br>locus_tag="HZT40_08375"                             |
| <i>sdhA</i>                                                                             | Succinate dehydrogenase flavoprotein subunit (EC 1.3.99.1)                                   | fig 6666666.654935.peg.1357                                                              | QLQ31174.1                                                            |

|                                            |                                                                          |                                                            |                                                         |
|--------------------------------------------|--------------------------------------------------------------------------|------------------------------------------------------------|---------------------------------------------------------|
| <i>sdhB</i>                                | Succinate dehydrogenase iron-sulfur protein (EC 1.3.99.1)                | fig 6666666.654935.peg.1356                                | QLQ31173.1                                              |
| <i>sdhC</i>                                | Succinate dehydrogenase cytochrome b-556 subunit (EC 1.3.99.1)           | fig 6666666.654935.peg.1359                                | QLQ31175.1                                              |
| <i>sdhD</i>                                | Succinate dehydrogenase hydrophobic membrane anchor protein (EC 1.3.5.1) | fig 6666666.654935.peg.1358                                | WP_002706930.1<br>locus_tag="HZT40_05675"               |
| <i>fumA</i>                                | Fumarate hydratase class I, aerobic (EC 4.2.1.2)                         | fig 6666666.654935.peg.2555                                | QLQ31155.1                                              |
| <i>fumC</i>                                | Fumarate hydratase class I, aerobic (EC 4.2.1.2)                         | —                                                          | QLQ31685.1                                              |
| <i>mgo</i>                                 | Malate:quinone oxidoreductase (EC 1.1.5.4)                               | fig 6666666.654935.peg.2675                                | QLQ32494.1                                              |
| <i>pckA</i>                                | Phosphoenolpyruvate carboxykinase (ATP) (EC 4.1.1.49)                    | fig 6666666.654935.peg.3025                                | QLQ31415.1                                              |
| <i>aspB</i>                                | Aspartate aminotransferase (EC 2.6.1.1)                                  | fig 6666666.654935.peg.2488                                | QLQ34144.1                                              |
| <i>gltB</i>                                | Glutamate synthase (NADPH) large chain (EC 1.4.1.13)                     | —                                                          | QLQ32096.1                                              |
| <i>gltD</i>                                | Glutamate synthase (NADPH) small chain (EC 1.4.1.13)                     | fig 6666666.654935.peg.751                                 | QLQ32571.1<br>WP_010871407.1<br>locus_tag="HZT40_11410" |
| <i>aceA</i>                                | Isocitrate lyase (EC 4.1.3.1)                                            | fig 6666666.654935.peg.2674                                | WP_002554010.1<br>locus_tag="HZT40_13880"               |
| <i>aceB</i>                                | Malate synthase G (EC 2.3.3.9)                                           | fig 6666666.654935.peg.2950                                | QLQ33085.1                                              |
| <i>maeB</i>                                | NADP-dependent malic enzyme (EC 1.1.1.40)                                | fig 6666666.654935.peg.1819<br>fig 6666666.654935.peg.2001 | QLQ33532.1<br>QLQ33315.1                                |
| <i>ppc</i>                                 | phosphoenolpyruvate carboxylase (EC 4.1.1.31)                            | —                                                          | QLQ32413.1                                              |
| <i>pyc</i>                                 | Pyruvate carboxylase (EC 6.4.1.1)                                        | fig 6666666.654935.peg.1183                                | QLQ31324.1                                              |
| <b>Antioxidant protection</b>              |                                                                          |                                                            |                                                         |
| <i>SOD2</i>                                | Superoxide dismutase [Fe] (EC 1.15.1.1)                                  | fig 6666666.654935.peg.134                                 | QLQ30489.1                                              |
| <i>CAT2</i>                                | catalase/peroxidase HPI (EC 1.11.1.21)                                   | —                                                          | QLQ32619.1                                              |
| <b>Respiratory Electron Transfer Chain</b> |                                                                          |                                                            |                                                         |
| <b>Complex 1 NADH-dehydrogenase</b>        |                                                                          |                                                            |                                                         |
| <i>nuoA</i>                                | NADH ubiquinone oxidoreductase chain A (EC 1.6.5.3)                      | fig 6666666.654935.peg.1196                                | WP_012982121.1<br>locus_tag="HZT40_16395"               |
| <i>nuoB</i>                                | NADH-ubiquinone oxidoreductase chain B (EC 1.6.5.3)                      | fig 6666666.654935.peg.1197                                | QLQ32569.1<br>WP_004630808.1<br>locus_tag="HZT40_16390" |
| <i>nuoC</i>                                | NADH-ubiquinone oxidoreductase chain C (EC 1.6.5.3)                      | fig 6666666.654935.peg.1198                                | QLQ32570.1<br>QLQ32909.1                                |
| <i>nuoD</i>                                | NADH-ubiquinone oxidoreductase chain D (EC 1.6.5.3)                      | fig 6666666.654935.peg.1199                                | QLQ32908.1<br>WP_002707159.1<br>locus_tag="HZT40_14375" |
| <i>nuoE</i>                                | NADH-ubiquinone oxidoreductase chain E (EC 1.6.5.3)                      | fig 6666666.654935.peg.1200                                | QLQ34262.1                                              |

|                                             |                                                                                            |                                                           |                                                                       |
|---------------------------------------------|--------------------------------------------------------------------------------------------|-----------------------------------------------------------|-----------------------------------------------------------------------|
| <i>nuoF</i>                                 | NADH-ubiquinone<br>oxidoreductase chain F (EC<br>1.6.5.3)                                  | fig 6666666.654935.peg.1201                               | QLQ32907.1<br>QLQ32567.1                                              |
| <i>nuoG</i>                                 | NADH-ubiquinone<br>oxidoreductase chain G (EC<br>1.6.5.3)                                  | fig 6666666.654935.peg.1202                               | QLQ32906.1                                                            |
| <i>nuoH</i>                                 | NADH-ubiquinone<br>oxidoreductase chain H (EC<br>1.6.5.3)                                  | fig 6666666.654935.peg.1203                               | QLQ32905.1<br>QLQ32568.1                                              |
| <i>nuoI</i>                                 | NADH-ubiquinone<br>oxidoreductase chain I (EC<br>1.6.5.3)                                  | fig 6666666.654935.peg.1204                               | QLQ32904.1                                                            |
| <i>nuoJ</i>                                 | NADH-ubiquinone<br>oxidoreductase chain J (EC<br>1.6.5.3)                                  | fig 6666666.654935.peg.1205                               | QLQ32903.1                                                            |
| <i>nuoK</i>                                 | NADH-ubiquinone<br>oxidoreductase chain K (EC<br>1.6.5.3)                                  | fig 6666666.654935.peg.1206                               | QLQ32902.1<br>QLQ32566.1                                              |
| <i>nuoL</i>                                 | NADH-ubiquinone<br>oxidoreductase chain L (EC<br>1.6.5.3)                                  | fig 6666666.654935.peg.1207                               | QLQ32901.1<br>QLQ33633.1                                              |
| <i>nuoM</i>                                 | NADH-ubiquinone<br>oxidoreductase chain M (EC<br>1.6.5.3)                                  | fig 6666666.654935.peg.1208                               | QLQ33636.1<br>QLQ33632.1<br>WP_008291478.1<br>locus_tag="HZT40_16335" |
| <i>nuoN</i>                                 | NADH-ubiquinone<br>oxidoreductase chain N (EC<br>1.6.5.3)                                  | fig 6666666.654935.peg.1209                               | QLQ32900.1                                                            |
| <b>Complex II (succinate dehydrogenase)</b> |                                                                                            |                                                           |                                                                       |
| <i>sdhC</i>                                 | Succinate dehydrogenase,<br>cytochrome b556 subunit<br>(EC 1.3.99.1)                       | fig 6666666.654935.peg.1359                               | QLQ31175.1                                                            |
| <i>sdhD</i>                                 | Succinate dehydrogenase,<br>hydrophobic membrane<br>anchor protein (EC 1.3.5.1)            | fig 6666666.654935.peg.1358                               | WP_002706930.1<br>locus_tag="HZT40_05675"                             |
| <i>sdhA</i>                                 | Succinate dehydrogenase<br>flavoprotein subunit (EC<br>1.3.99.1)                           | fig 6666666.654935.peg.1357                               | QLQ31174.1                                                            |
| <i>sdhB</i>                                 | Succinate dehydrogenase<br>iron-sulfur protein (EC<br>1.3.99.1)                            | fig 6666666.654935.peg.1356                               | QLQ31173.1                                                            |
| <b>Complex III</b>                          |                                                                                            |                                                           |                                                                       |
| <i>cytB</i>                                 | ubiquinol-cytochrome c<br>reductase cytochrome b<br>subunit (EC 7.1.1.8)                   | fig 6666666.654935.peg.1086<br>fig 6666666.654935.peg.277 | QLQ31660.1                                                            |
| <i>cyc1</i>                                 | ubiquinol-cytochrome c<br>reductase cytochrome c1<br>subunit (EC 7.1.1.8)                  | fig 6666666.654935.peg.1085                               | QLQ31659.1                                                            |
| <i>rip1</i><br>(ISP)                        | ubiquinol-cytochrome c<br>reductase iron-sulfur subunit<br>(EC 7.1.1.8)                    | fig 6666666.654935.peg.1087                               | QLQ31661.1<br>QLQ31570.1                                              |
| <b>Complex IV (terminal oxydases)</b>       |                                                                                            |                                                           |                                                                       |
| <i>cyoE</i>                                 | Heme A synthase,<br>cytochrome oxidase<br>biogenesis protein Cox15-<br>CtaA (EC 2.5.1.141) | fig 6666666.654935.peg.115                                | QLQ31913.1                                                            |
| <i>cox11</i>                                | cytochrome c oxidase<br>assembly protein subunit 11<br>(EC 7.1.1.9)                        | fig 6666666.654935.peg.109                                | QLQ31908.1<br>QLQ31900.1                                              |

|                                |                                                                                 |                                                                                          |                                                                   |
|--------------------------------|---------------------------------------------------------------------------------|------------------------------------------------------------------------------------------|-------------------------------------------------------------------|
| <i>cox15</i>                   | cytochrome c oxidase assembly protein subunit 15 (EC 7.1.1.9)                   | fig 6666666.654935.peg.1879                                                              | QLQ31913.1                                                        |
| <i>coxB</i>                    | cytochrome c oxidase subunit II (EC 7.1.1.9)                                    | fig 6666666.654935.peg.106                                                               | QLQ31902.1<br>QLQ31910.1                                          |
| <i>coxA</i>                    | cytochrome c oxidase subunit I (EC 7.1.1.9)                                     | fig 6666666.654935.peg.107                                                               | QLQ31901.1<br>QLQ31909.1                                          |
| <i>coxC</i>                    | cytochrome c oxidase subunit III (EC 7.1.1.9)                                   | fig 6666666.654935.peg.110                                                               | QLQ31907.1<br>QLQ31899.1<br>QLQ34175.1                            |
| <i>coxD</i>                    | cytochrome c oxidase subunit IV (EC 7.1.1.9)                                    |                                                                                          | QLQ32013.1                                                        |
| <i>cydA</i>                    | Cytochrome d ubiquinol oxidase subunit I (EC 7.1.1.7)                           | fig 6666666.654935.peg.2173                                                              | QLQ31581.1                                                        |
| <i>cydB</i>                    | Cytochrome d ubiquinol oxidase subunit II (EC 7.1.1.7)                          | fig 6666666.654935.peg.2172                                                              | QLQ31580.1                                                        |
| <i>cydC</i>                    | Transport ATP-binding protein CydC                                              | fig 6666666.659398.peg.1687<br>fig 6666666.659398.peg.1690                               | WP_002706844.1<br>locus_tag="HZT40_08230"                         |
| <i>cydD</i>                    | Transport ATP-binding protein CydD                                              | fig 6666666.654935.peg.2171                                                              | QLQ31578.1                                                        |
| <i>cydX</i>                    | cytochrome bd-I ubiquinol oxidase subunit X (EC 7.1.1.7)                        |                                                                                          | QLQ31579.1                                                        |
| <i>ccoN</i>                    | cytochrome c oxidase cbb3-type subunit I (EC 1.9.3.1)                           | fig 6666666.654935.peg.811<br>fig 6666666.654935.peg.1292                                | QLQ32538.1<br>QLQ30879.1<br>QLQ32042.1<br>locus_tag="HZT40_10230" |
| <i>ccoO</i>                    | cytochrome c oxidase cbb3-type subunit II (EC 7.1.1.9)                          | fig 6666666.654935.peg.810<br>fig 6666666.654935.peg.1293                                | QLQ30880.1<br>QLQ32537.1                                          |
| <i>ccoP</i>                    | cytochrome c oxidase cbb3-type subunit III (EC 7.1.1.9)                         | fig 6666666.654935.peg.808<br>fig 6666666.654935.peg.1295                                | QLQ30881.1<br>QLQ34081.1<br>QLQ32536.1                            |
| <i>ccoG</i><br>( <i>FixG</i> ) | Type cbb3 cytochrome oxidase biogenesis protein CcoG, involved in Cu oxidation  | fig 6666666.659398.peg.1742<br>fig 6666666.659398.peg.2266<br>fig 6666666.659398.peg.805 | QLQ30882.1<br>QLQ31613.1                                          |
| <i>ccoQ</i>                    | CcoQ/FixQ family Cbb3-type cytochrome c oxidase assembly chaperone (EC 1.9.3.1) | fig 6666666.659398.peg.803                                                               | QLQ34234.1                                                        |
| <i>ccoS</i>                    | cbb3-type cytochrome oxidase assembly protein CcoS                              | fig 6666666.659398.peg.1739                                                              | WP_020559959.1<br>locus_tag="HZT40_08450"                         |
| <b>ATPase</b>                  |                                                                                 |                                                                                          |                                                                   |
| <i>atpA</i>                    | F-type H <sup>+</sup> -transporting ATPase subunit alpha (EC 7.1.2.2)           | fig 6666666.654935.peg.180                                                               | QLQ32745.1                                                        |
| <i>atpD</i>                    | F-type H <sup>+</sup> -transporting ATPase subunit beta (EC 7.1.2.2)            | fig 6666666.654935.peg.178                                                               | QLQ32743.1                                                        |
| <i>atpH</i>                    | F-type H <sup>+</sup> -transporting ATPase subunit delta (EC 7.1.2.2)           | fig 6666666.654935.peg.181                                                               | QLQ32746.1                                                        |
| <i>atpC</i>                    | F-type H <sup>+</sup> -transporting ATPase subunit epsilon (EC 7.1.2.2)         | fig 6666666.654935.peg.177                                                               | QLQ32742.1                                                        |
| <i>atpG</i>                    | F-type H <sup>+</sup> -transporting ATPase subunit gamma (EC 7.1.2.2)           | fig 6666666.654935.peg.179                                                               | QLQ32744.1                                                        |



|             |                                                                      |                            |                          |
|-------------|----------------------------------------------------------------------|----------------------------|--------------------------|
| <i>atpB</i> | F-type H <sup>+</sup> -transporting<br>ATPase subunit a (EC 7.1.2.2) | fig 6666666.654935.peg.184 | QLQ32712.1<br>QLQ32748.1 |
| <i>atpF</i> | F-type H <sup>+</sup> -transporting<br>ATPase subunit b (EC 7.1.2.2) | fig 6666666.654935.peg.182 | QLQ32747.1               |
| <i>atpE</i> | ATP synthase F0 sector<br>subunit c (EC 7.1.2.2)                     | fig 6666666.654935.peg.183 | QLQ34252.1               |
